# Supplementary material for: Memory enhancement effect of saponins from Eleutherococcus senticosus leaves and blood–brain barrier-permeated saponins profiling using a pseudotargeted monitoring strategy
Source: Royal Society of Chemistry journal article supplement (doi:10.1039/d1fo03078g), 2022-01-01
Supplement: d1fo03078g1.pdf [file d1fo03078g1.pdf]

## Supplementary information

### Memory enhancement effect of saponins from *Eleutherococcus senticosus* leaves and blood-brain barrier-permeated saponins profiling using a pseudotargeted monitoring strategy

Yu-Hong Huang<sup>a,b,c,1</sup>, Wen-Luan Ding<sup>a,b,c,1</sup>, Xi-Tao Li<sup>a,b,c</sup>, Meng-Ting Cai<sup>a,b,c</sup>, Hui-Lin Li<sup>a,b,c</sup>, Zhi-You Yang<sup>d</sup>, Xiu-Hong Piao<sup>b,c,e,\*</sup>, Shu Zhu<sup>f</sup>, Chihiro Tohda<sup>f</sup>, Katsuko Komatsu<sup>f</sup>, Shu-Mei Wang<sup>a,b,c,\*</sup>, Yue-Wei Ge<sup>a,b,c,\*</sup>

#### Authors Information

<sup>a</sup> School of Chinese Materia Medica, Guangdong Pharmaceutical University, Guangzhou 510006, China

<sup>b</sup> Key Laboratory of Digital Quality Evaluation of Chinese Materia Medica of State Administration of TCM, Guangdong Pharmaceutical University, Guangzhou 510006, China

<sup>c</sup> Engineering & Technology Research Center for Chinese Materia Medica Quality of the Universities of Guangdong Province, Guangdong Pharmaceutical University, Guangzhou 510006, China

<sup>d</sup> Guangdong Provincial Key Laboratory of Aquatic Product Processing and Safety, College of Food Science and Technology, Guangdong Ocean University, Zhanjiang 524088, China.

<sup>e</sup> School of Life Sciences and Biopharmaceutics, Guangdong Pharmaceutical University, Guangzhou 510006, China

<sup>f</sup> Institute of Natural Medicine, University of Toyama, Toyama 930-0194, Japan

#### \*Corresponding authors

E-mail: yueweige@gdpu.edu.cn (Y.-W. Ge); piaoxiuhong@163.com (X.-H. Piao); gdpuwsm@126.com (S.-M. Wang)

Tel.: +86-20-39352177 (Y.-W. Ge)

Add.: Waihuan East Road 280, Guangzhou Higher Education Mega Center, Guangzhou 510006, Guangdong, China

1, These authors made equal contributions to this work.

## **Experimental**

**Hematological and enzyme assays.** After the last administration, blood sample of behavioral tests' rats were collected from abdominal aorta into heparinized tubes at 1 h, and then centrifuged at 4000 rpm for 15 min (4 °C) to obtain plasma. The supernatant was collected as plasma and stored at -80 °C before analysis. The determination of alanine aminotransferase (ALT), aspartate aminotransferase (AST) and alkaline phosphatase (ALP) activities were conducted through enzymatic methods using the Chemray 800 Automatic Biochemical Analyzer (Rayto Life and Analytical Sciences Co., Ltd., China).

**A**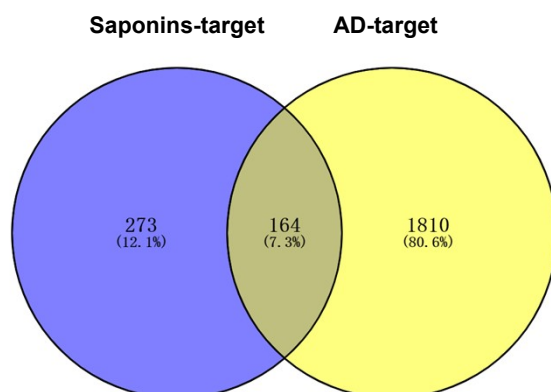**B**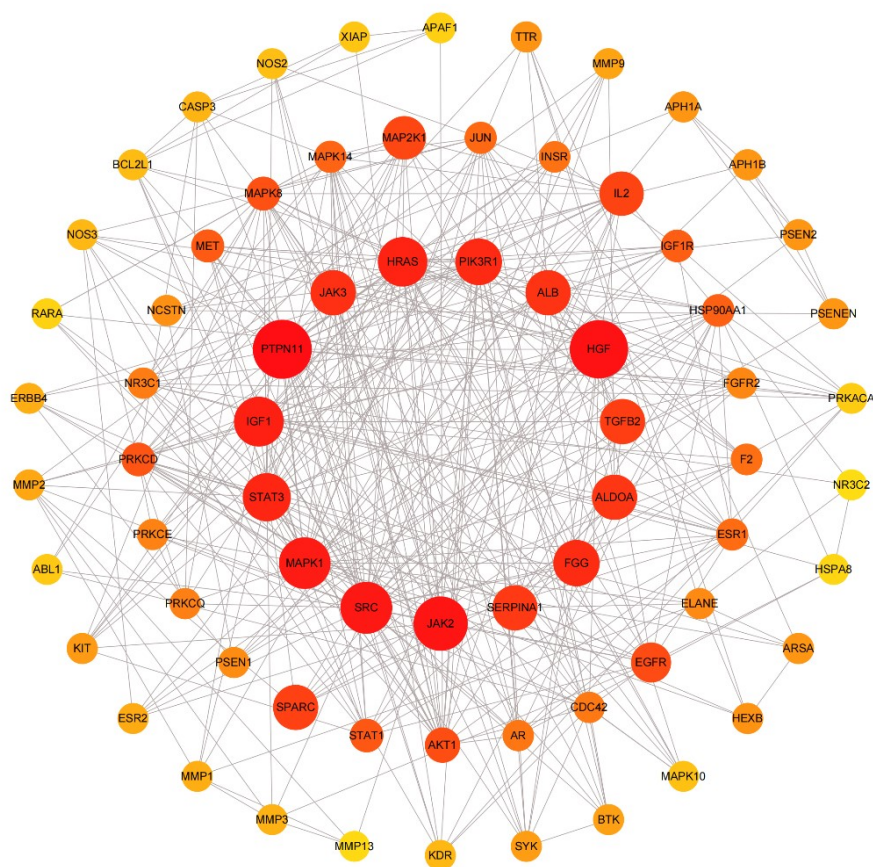

**Fig. S1** Network pharmacology Diagram of bioactive saponins. (A) Intersection of component targets and AD-related targets; (B) Key targets in protein-protein interaction (PPI) network.

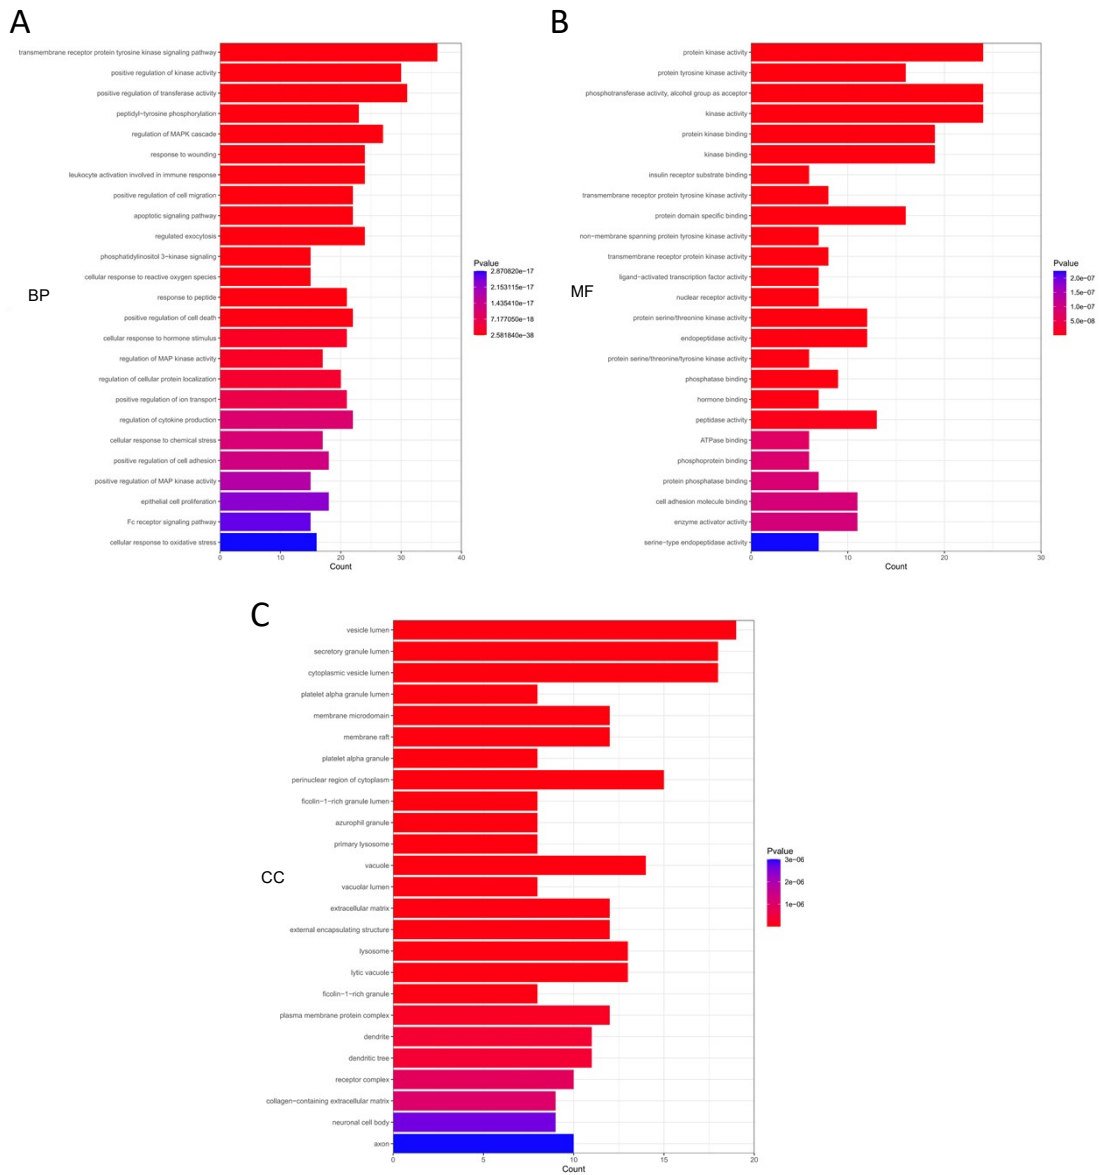

**Fig. S2** GO enrichment analysis for 70 key targets. (A) Biological process (BP); (B) Molecular function (MF); (C) Cellular component (CC).

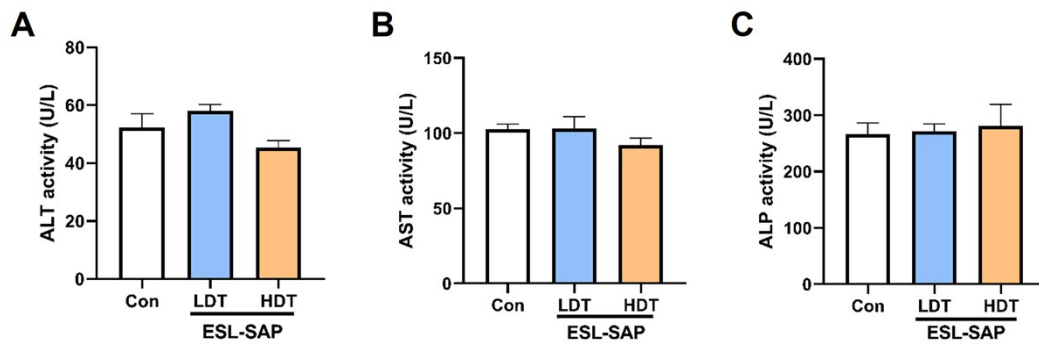

**Fig. S3** ALT, AST and ALP activities in plasma of rats. (A) ALT activity. (B) AST activity. (C) ALP activity. Data were presented as mean  $\pm$  SEM, with significance different from control (n=4) \*P<0.05.

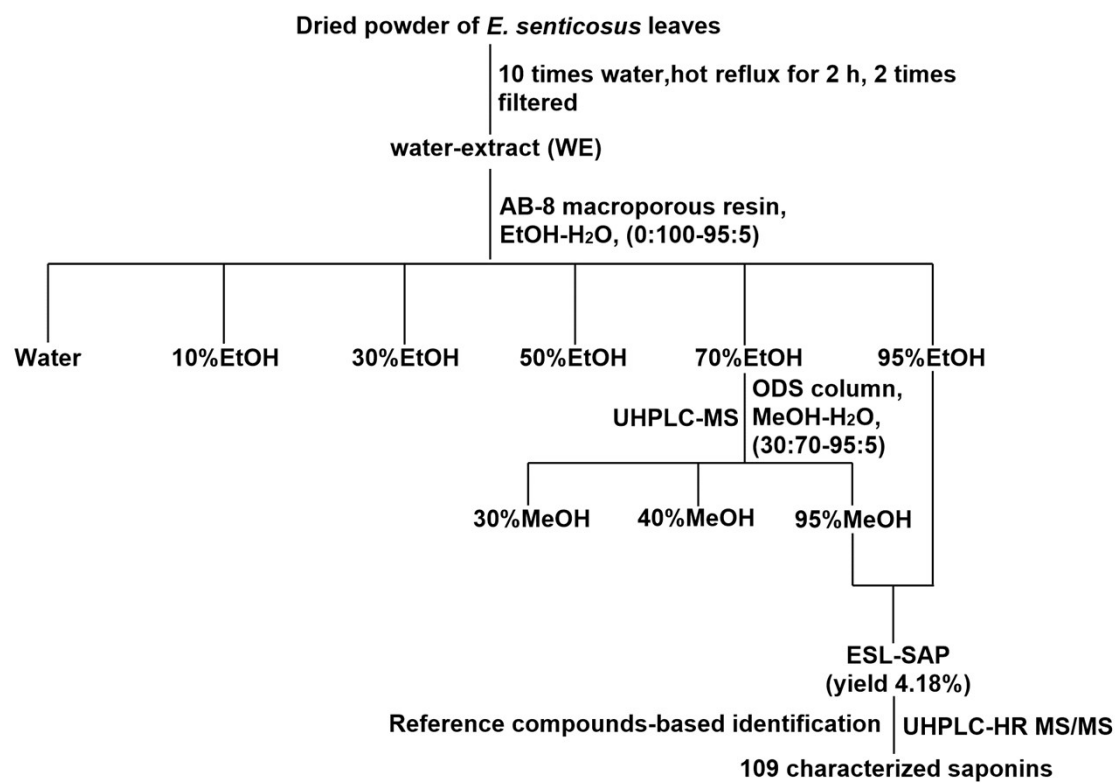

**Fig. S4** The workflow of the preparation of ESL-SAP.

**Table S1** Characterization of 109 triterpene saponins in ESL-SAP

| No. | $t_R$<br>(min) | Precursor Ion<br>( $m/z$ ) | Characterization <sup>a</sup> |                 |                |                                                  |
|-----|----------------|----------------------------|-------------------------------|-----------------|----------------|--------------------------------------------------|
|     |                |                            | aglycone                      | $\alpha$ -chain | $\beta$ -chain | formula                                          |
| 1   | 55.96          | 763.4276                   | I                             | -               | -A-R           | C <sub>40</sub> H <sub>62</sub> O <sub>11</sub>  |
| 2   | 54.57          | 779.4224                   | I                             | -               | -A-G           | C <sub>40</sub> H <sub>62</sub> O <sub>12</sub>  |
| 3   | 43.76          | 1087.5324                  | I                             | -G-G-R          | -A             | C <sub>52</sub> H <sub>82</sub> O <sub>21</sub>  |
| 4   | 45.32          | 1129.5440                  | I                             | -G-G(Ac)-R      | -A             | C <sub>54</sub> H <sub>84</sub> O <sub>22</sub>  |
| 5*  | 46.54          | 1129.5431                  | I                             | -G-G(Ac)-R      | -A             | C <sub>54</sub> H <sub>84</sub> O <sub>22</sub>  |
| 6   | 52.04          | 1187.5845                  | I                             | -G(R)-G         | -A-R           | C <sub>58</sub> H <sub>92</sub> O <sub>25</sub>  |
| 7   | 52.55          | 1187.5870                  | I                             | -G(R)-G         | -A-R           | C <sub>58</sub> H <sub>92</sub> O <sub>25</sub>  |
| 8   | 52.59          | 1229.5957                  | I                             | -G(R)-G(Ac)     | -A-R           | C <sub>60</sub> H <sub>94</sub> O <sub>26</sub>  |
| 9*  | 42.43          | 1233.5903                  | I                             | -G-G-R          | -A-R           | C <sub>58</sub> H <sub>92</sub> O <sub>25</sub>  |
| 10  | 40.89          | 1249.5866                  | I                             | -G-G-R          | -A-G           | C <sub>58</sub> H <sub>92</sub> O <sub>26</sub>  |
| 11  | 41.19          | 1249.5857                  | I                             | -G-G-R          | -A-G           | C <sub>58</sub> H <sub>92</sub> O <sub>26</sub>  |
| 12* | 44.55          | 1275.6002                  | I                             | -G-G(Ac)-R      | -A-R           | C <sub>60</sub> H <sub>94</sub> O <sub>26</sub>  |
| 13  | 45.21          | 1275.6017                  | I                             | -G-G(Ac)-R      | -A-R           | C <sub>60</sub> H <sub>94</sub> O <sub>26</sub>  |
| 14* | 42.73          | 1291.5963                  | I                             | -G-G(Ac)-R      | -A-G           | C <sub>60</sub> H <sub>94</sub> O <sub>27</sub>  |
| 15  | 41.70          | 1291.5967                  | I                             | -G-G(Ac)-R      | -A-G           | C <sub>60</sub> H <sub>94</sub> O <sub>27</sub>  |
| 16  | 43.82          | 1317.6104                  | I                             | -G-G(Ac)-R(Ac)  | -A-R           | C <sub>62</sub> H <sub>96</sub> O <sub>27</sub>  |
| 17  | 41.06          | 1453.6467                  | I                             | -G-G(Ac)-R      | -A-G-G         | C <sub>66</sub> H <sub>104</sub> O <sub>32</sub> |
| 18  | 59.95          | 633.4020                   | II                            | -               | -A             | C <sub>35</sub> H <sub>56</sub> O <sub>7</sub>   |
| 19  | 57.28          | 663.4116                   | II                            | -G              | -              | C <sub>36</sub> H <sub>58</sub> O <sub>8</sub>   |
| 20  | 57.85          | 779.4586                   | II                            | -               | -A-R           | C <sub>41</sub> H <sub>66</sub> O <sub>11</sub>  |
| 21  | 48.94          | 793.4383                   | II                            | -G              | -Gu            | C <sub>42</sub> H <sub>66</sub> O <sub>14</sub>  |
| 22  | 56.25          | 795.4539                   | II                            | -G              | -A             | C <sub>41</sub> H <sub>66</sub> O <sub>12</sub>  |
| 23  | 56.42          | 795.4542                   | II                            | -               | -A-G           | C <sub>41</sub> H <sub>66</sub> O <sub>12</sub>  |
| 24  | 55.46          | 825.4657                   | II                            | -               | -G-G           | C <sub>42</sub> H <sub>68</sub> O <sub>13</sub>  |
| 25  | 43.23          | 955.4908                   | II                            | -G-G            | -Gu            | C <sub>48</sub> H <sub>76</sub> O <sub>19</sub>  |
| 26  | 46.22          | 957.5082                   | II                            | -G-G            | -A             | C <sub>47</sub> H <sub>76</sub> O <sub>17</sub>  |
| 27  | 48.70          | 957.5075                   | II                            | -G              | -A-G           | C <sub>47</sub> H <sub>76</sub> O <sub>17</sub>  |
| 28  | 53.48          | 971.5226                   | II                            | -G-G-R          | -              | C <sub>48</sub> H <sub>78</sub> O <sub>17</sub>  |
| 29  | 52.49          | 981.5064                   | II                            | -G (Ma)         | -A-R           | C <sub>50</sub> H <sub>78</sub> O <sub>19</sub>  |
| 30  | 51.37          | 997.5006                   | II                            | -G(Ma)          | -A-G           | C <sub>50</sub> H <sub>78</sub> O <sub>20</sub>  |
| 31  | 44.80          | 1103.5635                  | II                            | -G-G-R          | -A             | C <sub>53</sub> H <sub>86</sub> O <sub>21</sub>  |
| 32  | 45.45          | 1103.5648                  | II                            | -G-G-R          | -A             | C <sub>53</sub> H <sub>86</sub> O <sub>21</sub>  |
| 33  | 45.76          | 1103.5656                  | II                            | -G-G            | -A-R           | C <sub>53</sub> H <sub>86</sub> O <sub>21</sub>  |
| 34* | 46.76          | 1103.5641                  | II                            | -G-G-R          | -A             | C <sub>53</sub> H <sub>86</sub> O <sub>21</sub>  |
| 35  | 41.81          | 1119.5603                  | II                            | -G-G            | -A-G           | C <sub>53</sub> H <sub>86</sub> O <sub>22</sub>  |
| 36  | 43.54          | 1119.5585                  | II                            | -G-G            | -A-G           | C <sub>53</sub> H <sub>86</sub> O <sub>22</sub>  |
| 37  | 44.48          | 1143.5544                  | II                            | -G-G(Ac)-R      | -Gu            | C <sub>56</sub> H <sub>88</sub> O <sub>24</sub>  |
| 38  | 46.71          | 1145.5701                  | II                            | -G-G(Ac)-R      | -A             | C <sub>55</sub> H <sub>88</sub> O <sub>22</sub>  |
| 39  | 47.17          | 1145.5721                  | II                            | -G-G(Ac)-R      | -A             | C <sub>55</sub> H <sub>88</sub> O <sub>22</sub>  |
| 40  | 49.29          | 1145.5752                  | II                            | -G-G(Ac)-R      | -A             | C <sub>55</sub> H <sub>88</sub> O <sub>22</sub>  |
| 41  | 49.46          | 1145.5764                  | II                            | -G-G(Ac)-R      | -A             | C <sub>55</sub> H <sub>88</sub> O <sub>22</sub>  |
| 42  | 43.31          | 1203.6158                  | II                            | -G(R)-G         | -A-R           | C <sub>59</sub> H <sub>96</sub> O <sub>25</sub>  |
| 43  | 53.76          | 1203.6168                  | II                            | -G(R)-G         | -A-R           | C <sub>59</sub> H <sub>96</sub> O <sub>25</sub>  |
| 44  | 54.29          | 1245.6274                  | II                            | -G(R)-G(Ac)     | -A-R           | C <sub>61</sub> H <sub>98</sub> O <sub>26</sub>  |
| 45* | 44.72          | 1249.6215                  | II                            | -G-G-R          | -A-R           | C <sub>59</sub> H <sub>96</sub> O <sub>25</sub>  |
| 46  | 42.82          | 1265.6167                  | II                            | -G-G-R          | -A-G           | C <sub>59</sub> H <sub>96</sub> O <sub>26</sub>  |
| 47* | 47.81          | 1291.6322                  | II                            | -G-G(Ac)-R      | -A-R           | C <sub>61</sub> H <sub>98</sub> O <sub>26</sub>  |
| 48  | 40.95          | 1295.6274                  | II                            | -G-G-R          | -G-G           | C <sub>60</sub> H <sub>98</sub> O <sub>27</sub>  |
| 49* | 44.97          | 1307.6267                  | II                            | -G-G(Ac)-R      | -A-G           | C <sub>61</sub> H <sub>98</sub> O <sub>27</sub>  |
| 50  | 45.49          | 1307.6279                  | II                            | -G-G(Ac)-R      | -A-G           | C <sub>61</sub> H <sub>98</sub> O <sub>27</sub>  |
| 51  | 42.19          | 1469.6808                  | II                            | -G-G(Ac)-R      | -A-G-G         | C <sub>67</sub> H <sub>108</sub> O <sub>32</sub> |
| 52  | 53.95          | 647.3814                   | III                           | -               | -A             | C <sub>35</sub> H <sub>54</sub> O <sub>8</sub>   |

Table S1 Continued

| No.  | t <sub>R</sub><br>(min) | Precursor Ion<br>(m/z) | Characterization <sup>a</sup> |            |         |                                                  |
|------|-------------------------|------------------------|-------------------------------|------------|---------|--------------------------------------------------|
|      |                         |                        | aglycone                      | α-chain    | β-chain | formula                                          |
| 53   | 52.35                   | 793.4384               | III                           | -          | -A-R    | C <sub>41</sub> H <sub>64</sub> O <sub>12</sub>  |
| 54   | 48.96                   | 809.4332               | III                           | -          | -A-G    | C <sub>41</sub> H <sub>64</sub> O <sub>13</sub>  |
| 55   | 39.23                   | 1117.5435              | III                           | -G-G-R     | -A      | C <sub>53</sub> H <sub>84</sub> O <sub>22</sub>  |
| 56   | 40.74                   | 1117.5433              | III                           | -G-G-R     | -A      | C <sub>53</sub> H <sub>84</sub> O <sub>22</sub>  |
| 57   | 41.34                   | 1159.5551              | III                           | -G-G(Ac)-R | -A      | C <sub>55</sub> H <sub>86</sub> O <sub>23</sub>  |
| 58   | 38.41                   | 1263.6007              | III                           | -G-G-R     | -A-R    | C <sub>59</sub> H <sub>94</sub> O <sub>26</sub>  |
| 59   | 37.00                   | 1279.5957              | III                           | -G-G-R     | -A-G    | C <sub>59</sub> H <sub>94</sub> O <sub>27</sub>  |
| 60*  | 40.37                   | 1305.6119              | III                           | -G-G(Ac)-R | -A-R    | C <sub>61</sub> H <sub>96</sub> O <sub>27</sub>  |
| 61   | 38.94                   | 1321.6018              | III                           | -G-G(Ac)-R | -A-G    | C <sub>61</sub> H <sub>96</sub> O <sub>28</sub>  |
| 62*  | 40.25                   | 1265.6167              | IV                            | -G-G-R     | -A-R    | C <sub>59</sub> H <sub>96</sub> O <sub>26</sub>  |
| 63   | 39.18                   | 1281.6126              | IV                            | -G-G-R     | -A-G    | C <sub>59</sub> H <sub>96</sub> O <sub>27</sub>  |
| 64   | 42.83                   | 1307.6273              | IV                            | -G-G(Ac)-R | -A-R    | C <sub>61</sub> H <sub>98</sub> O <sub>27</sub>  |
| 65   | 55.42                   | 603.3906               | V                             | -          | -A      | C <sub>35</sub> H <sub>56</sub> O <sub>8</sub>   |
| 66   | 47.73                   | 649.3955               | V                             | -          | -A      | C <sub>35</sub> H <sub>56</sub> O <sub>8</sub>   |
| 67   | 45.42                   | 795.4539               | V                             | -          | -A-R    | C <sub>41</sub> H <sub>66</sub> O <sub>12</sub>  |
| 68   | 53.79                   | 795.4545               | V                             | -          | -A-R    | C <sub>41</sub> H <sub>66</sub> O <sub>12</sub>  |
| 69   | 42.58                   | 811.4489               | V                             | -          | -A-G    | C <sub>41</sub> H <sub>66</sub> O <sub>13</sub>  |
| 70   | 43.38                   | 811.4499               | V                             | -          | -A-G    | C <sub>41</sub> H <sub>66</sub> O <sub>13</sub>  |
| 71   | 52.85                   | 811.4457               | V                             | -G         | -A      | C <sub>41</sub> H <sub>66</sub> O <sub>13</sub>  |
| 72   | 36.19                   | 973.5015               | V                             | -G-G       | -A      | C <sub>47</sub> H <sub>76</sub> O <sub>18</sub>  |
| 73   | 36.52                   | 973.5013               | V                             | -G         | -A-G    | C <sub>47</sub> H <sub>76</sub> O <sub>18</sub>  |
| 74   | 40.58                   | 973.5009               | V                             | -          | -A-G-G  | C <sub>47</sub> H <sub>76</sub> O <sub>18</sub>  |
| 75   | 35.77                   | 1119.5587              | V                             | -G-G       | -A-R    | C <sub>53</sub> H <sub>86</sub> O <sub>22</sub>  |
| 76   | 40.94                   | 1119.5574              | V                             | -G-G-R     | -A      | C <sub>53</sub> H <sub>86</sub> O <sub>22</sub>  |
| 77   | 41.81                   | 1119.5598              | V                             | -G-G-R     | -A      | C <sub>53</sub> H <sub>86</sub> O <sub>22</sub>  |
| 78   | 34.23                   | 1135.5542              | V                             | -G-G       | -A-G    | C <sub>53</sub> H <sub>86</sub> O <sub>23</sub>  |
| 79   | 34.87                   | 1135.5571              | V                             | -G-G       | -A-G    | C <sub>53</sub> H <sub>86</sub> O <sub>23</sub>  |
| 80   | 43.34                   | 1159.5548              | V                             | -G-G(Ac)-R | -A(Ma)  | C <sub>56</sub> H <sub>88</sub> O <sub>25</sub>  |
| 81   | 37.75                   | 1161.5692              | V                             | -G-G(Ac)-R | -A      | C <sub>55</sub> H <sub>88</sub> O <sub>23</sub>  |
| 82   | 43.12                   | 1161.5691              | V                             | -G-G(Ac)-R | -A      | C <sub>55</sub> H <sub>88</sub> O <sub>23</sub>  |
| 83   | 44.00                   | 1161.5701              | V                             | -G-G(Ac)-R | -A      | C <sub>55</sub> H <sub>88</sub> O <sub>23</sub>  |
| 84   | 35.24                   | 1265.6160              | V                             | -G-G-R     | -A-R    | C <sub>59</sub> H <sub>96</sub> O <sub>26</sub>  |
| 85   | 33.55                   | 1281.6113              | V                             | -G-G-R     | -A-G    | C <sub>59</sub> H <sub>96</sub> O <sub>27</sub>  |
| 86*  | 37.17                   | 1307.6266              | V                             | -G-G(Ac)-R | -A-R    | C <sub>61</sub> H <sub>96</sub> O <sub>27</sub>  |
| 87   | 35.78                   | 1323.6219              | V                             | -G-G(Ac)-R | -A-G    | C <sub>61</sub> H <sub>96</sub> O <sub>28</sub>  |
| 88   | 41.56                   | 1323.6204              | V                             | -G-G(Ac)-R | -A-G    | C <sub>61</sub> H <sub>96</sub> O <sub>28</sub>  |
| 89   | 34.07                   | 1485.6771              | V                             | -G-G(Ac)-R | -A-G-G  | C <sub>67</sub> H <sub>108</sub> O <sub>33</sub> |
| 90   | 40.02                   | 1485.6774              | V                             | -G-G(Ac)-R | -A-G-G  | C <sub>67</sub> H <sub>108</sub> O <sub>33</sub> |
| 91   | 41.57                   | 999.4805               | VI                            | -G-G-R     | -       | C <sub>48</sub> H <sub>74</sub> O <sub>19</sub>  |
| 92   | 45.57                   | 617.3699               | VII                           | -          | -A      | C <sub>35</sub> H <sub>54</sub> O <sub>9</sub>   |
| 93   | 44.07                   | 763.4278               | VII                           | -          | -A-R    | C <sub>41</sub> H <sub>64</sub> O <sub>13</sub>  |
| 94   | 41.30                   | 779.4232               | VII                           | -G         | -A      | C <sub>41</sub> H <sub>64</sub> O <sub>14</sub>  |
| 95   | 42.14                   | 779.4232               | VII                           | -G         | -A      | C <sub>41</sub> H <sub>64</sub> O <sub>14</sub>  |
| 96   | 34.59                   | 1087.5328              | VII                           | -G-G-R     | -A      | C <sub>53</sub> H <sub>84</sub> O <sub>23</sub>  |
| 97   | 36.74                   | 1129.5432              | VII                           | -G-G(Ac)-R | -A      | C <sub>55</sub> H <sub>86</sub> O <sub>24</sub>  |
| 98   | 36.89                   | 1129.5431              | VII                           | -G-G(Ac)-R | -A      | C <sub>55</sub> H <sub>86</sub> O <sub>24</sub>  |
| 99   | 34.42                   | 1233.5908              | VII                           | -G-G-R     | -A-R    | C <sub>59</sub> H <sub>94</sub> O <sub>27</sub>  |
| 100  | 39.02                   | 1233.5906              | VII                           | -G(R)-G-R  | -A      | C <sub>59</sub> H <sub>93</sub> O <sub>27</sub>  |
| 101  | 32.52                   | 1249.5857              | VII                           | -G-G-R     | -A-G    | C <sub>59</sub> H <sub>94</sub> O <sub>28</sub>  |
| 102  | 32.82                   | 1249.5855              | VII                           | -G-G-R     | -A-G    | C <sub>59</sub> H <sub>94</sub> O <sub>28</sub>  |
| 103* | 36.56                   | 1275.6008              | VII                           | -G-G(Ac)-R | -A-R    | C <sub>61</sub> H <sub>96</sub> O <sub>28</sub>  |
| 104  | 35.12                   | 1291.5964              | VII                           | -G-G(Ac)-R | -A-G    | C <sub>61</sub> H <sub>96</sub> O <sub>29</sub>  |



**Table S1 Continued**

| No. | t <sub>R</sub><br>(min) | Precursor Ion<br>(m/z) | Characterization <sup>a</sup> |            |         |                                                 |
|-----|-------------------------|------------------------|-------------------------------|------------|---------|-------------------------------------------------|
|     |                         |                        | aglycone                      | α-chain    | β-chain | formula                                         |
| 105 | 41.79                   | 781.4390               | VIII                          | -          | -A-R    | C <sub>40</sub> H <sub>64</sub> O <sub>12</sub> |
| 106 | 39.10                   | 797.4329               | VIII                          | -G         | -A      | C <sub>40</sub> H <sub>64</sub> O <sub>13</sub> |
| 107 | 52.42                   | 989.4950               | VIII                          | -G         | -G-     | C <sub>47</sub> H <sub>76</sub> O <sub>19</sub> |
| 108 | 35.01                   | 1147.5542              | VIII                          | -G-G(Ac)-R | -A      | C <sub>54</sub> H <sub>86</sub> O <sub>23</sub> |
| 109 | 34.93                   | 1293.6112              | VIII                          | -G-G(Ac)-R | -A-R    | C <sub>60</sub> H <sub>96</sub> O <sub>27</sub> |

\*, compounds identified by comparing with reference compounds. 5, ciwujianoside D2; 9, ciwujianoside B; 12, ciwujianoside C2; 14, acanthopanaoside A; 34, ciwujianoside C3; 45, eleutheroside M; 47, ciwujianoside C4; 49, acanthopanaxoside B; 60, ezoukoginoside E; 62, tauroside H1; 86, ezoukoginoside C. 103, ezoukoginoside A; <sup>a</sup> I, akebonoic acid; II, oleanolic acid; III, 3-hydroxy-29-alolean-12-en-28-oic acid; IV, echinocystic acid; V, hederagenin or mesembryanthemoidigenic acid; VI, 3-oxo-11-methoxyolean-12-en-28-oic acid; VII, serratagenic acid; VIII, 3,20-dihydroxy-30-norlean-12-ene-28-oic acid; G, D-glucosyl moiety; R, L-rhamnosyl moiety; A, L-arabinosyl moiety; Ac, Acetyl group; Ma, Malonic acid moiety; Gu, Glucuronyl moiety. The linkage position between monosaccharides was neglected.

**Table S2** Precursor ions information of IVSL

| No. | Mass [m/z] | Formula                                         | No. | Mass [m/z] | Formula                                          |
|-----|------------|-------------------------------------------------|-----|------------|--------------------------------------------------|
| 1   | 485.3277   | C <sub>30</sub> H <sub>46</sub> O <sub>5</sub>  | 85  | 1041.5311  | C <sub>52</sub> H <sub>82</sub> O <sub>21</sub>  |
| 2   | 485.3278   | C <sub>29</sub> H <sub>44</sub> O <sub>3</sub>  | 86  | 1055.5059  | C <sub>52</sub> H <sub>80</sub> O <sub>22</sub>  |
| 3   | 499.3075   | C <sub>30</sub> H <sub>44</sub> O <sub>6</sub>  | 87  | 1073.5546  | C <sub>53</sub> H <sub>86</sub> O <sub>22</sub>  |
| 4   | 501.3221   | C <sub>29</sub> H <sub>44</sub> O <sub>4</sub>  | 88  | 1077.1370  | C <sub>51</sub> H <sub>100</sub> O <sub>20</sub> |
| 5   | 501.3237   | C <sub>30</sub> H <sub>46</sub> O <sub>6</sub>  | 89  | 1081.5193  | C <sub>53</sub> H <sub>80</sub> O <sub>20</sub>  |
| 6   | 503.3380   | C <sub>29</sub> H <sub>46</sub> O <sub>4</sub>  | 90  | 1087.5311  | C <sub>53</sub> H <sub>84</sub> O <sub>23</sub>  |
| 7   | 517.3175   | C <sub>29</sub> H <sub>44</sub> O <sub>5</sub>  | 91  | 1087.5345  | C <sub>52</sub> H <sub>82</sub> O <sub>21</sub>  |
| 8   | 517.3182   | C <sub>30</sub> H <sub>46</sub> O <sub>7</sub>  | 92  | 1103.5239  | C <sub>52</sub> H <sub>82</sub> O <sub>22</sub>  |
| 9   | 531.3325   | C <sub>30</sub> H <sub>46</sub> O <sub>5</sub>  | 93  | 1103.5653  | C <sub>53</sub> H <sub>86</sub> O <sub>21</sub>  |
| 10  | 531.3333   | C <sub>30</sub> H <sub>46</sub> O <sub>5</sub>  | 94  | 1105.6847  | C <sub>57</sub> H <sub>102</sub> O <sub>20</sub> |
| 11  | 533.3487   | C <sub>30</sub> H <sub>48</sub> O <sub>5</sub>  | 95  | 1115.5640  | C <sub>55</sub> H <sub>88</sub> O <sub>23</sub>  |
| 12  | 535.2236   | C <sub>30</sub> H <sub>34</sub> O <sub>6</sub>  | 96  | 1117.5443  | C <sub>53</sub> H <sub>84</sub> O <sub>22</sub>  |
| 13  | 535.3644   | C <sub>31</sub> H <sub>52</sub> O <sub>7</sub>  | 97  | 1119.5597  | C <sub>53</sub> H <sub>86</sub> O <sub>22</sub>  |
| 14  | 539.3032   | C <sub>31</sub> H <sub>42</sub> O <sub>5</sub>  | 98  | 1123.5116  | C <sub>59</sub> H <sub>80</sub> O <sub>21</sub>  |
| 15  | 545.3240   | C <sub>30</sub> H <sub>44</sub> O <sub>6</sub>  | 99  | 1123.6943  | C <sub>57</sub> H <sub>104</sub> O <sub>21</sub> |
| 16  | 617.3709   | C <sub>35</sub> H <sub>54</sub> O <sub>9</sub>  | 100 | 1129.5441  | C <sub>54</sub> H <sub>84</sub> O <sub>22</sub>  |
| 17  | 633.3654   | C <sub>34</sub> H <sub>52</sub> O <sub>8</sub>  | 101 | 1129.5452  | C <sub>55</sub> H <sub>86</sub> O <sub>24</sub>  |
| 18  | 647.3813   | C <sub>35</sub> H <sub>54</sub> O <sub>8</sub>  | 102 | 1133.5754  | C <sub>54</sub> H <sub>86</sub> O <sub>22</sub>  |
| 19  | 649.3964   | C <sub>35</sub> H <sub>56</sub> O <sub>8</sub>  | 103 | 1135.5471  | C <sub>61</sub> H <sub>84</sub> O <sub>20</sub>  |
| 20  | 651.4121   | C <sub>35</sub> H <sub>58</sub> O <sub>8</sub>  | 104 | 1139.7245  | C <sub>65</sub> H <sub>104</sub> O <sub>16</sub> |
| 21  | 663.3762   | C <sub>35</sub> H <sub>54</sub> O <sub>9</sub>  | 105 | 1145.5774  | C <sub>55</sub> H <sub>88</sub> O <sub>22</sub>  |
| 22  | 679.4072   | C <sub>36</sub> H <sub>58</sub> O <sub>9</sub>  | 106 | 1147.5563  | C <sub>54</sub> H <sub>86</sub> O <sub>23</sub>  |
| 23  | 741.3279   | C <sub>43</sub> H <sub>50</sub> O <sub>11</sub> | 107 | 1155.5212  | C <sub>55</sub> H <sub>82</sub> O <sub>23</sub>  |
| 24  | 749.4109   | C <sub>39</sub> H <sub>60</sub> O <sub>11</sub> | 108 | 1159.5557  | C <sub>55</sub> H <sub>86</sub> O <sub>23</sub>  |
| 25  | 749.4484   | C <sub>41</sub> H <sub>66</sub> O <sub>12</sub> | 109 | 1161.5698  | C <sub>55</sub> H <sub>88</sub> O <sub>23</sub>  |
| 26  | 763.4282   | C <sub>40</sub> H <sub>62</sub> O <sub>11</sub> | 110 | 1169.8250  | C <sub>57</sub> H <sub>104</sub> O <sub>21</sub> |
| 27  | 763.4290   | C <sub>41</sub> H <sub>64</sub> O <sub>13</sub> | 111 | 1173.5741  | C <sub>56</sub> H <sub>88</sub> O <sub>23</sub>  |
| 28  | 765.4429   | C <sub>41</sub> H <sub>66</sub> O <sub>13</sub> | 112 | 1187.5471  | C <sub>56</sub> H <sub>86</sub> O <sub>24</sub>  |
| 29  | 765.4446   | C <sub>40</sub> H <sub>64</sub> O <sub>11</sub> | 113 | 1187.5857  | C <sub>58</sub> H <sub>92</sub> O <sub>25</sub>  |
| 30  | 779.4225   | C <sub>41</sub> H <sub>64</sub> O <sub>14</sub> | 114 | 1187.5861  | C <sub>58</sub> H <sub>92</sub> O <sub>25</sub>  |
| 31  | 779.4235   | C <sub>40</sub> H <sub>62</sub> O <sub>12</sub> | 115 | 1203.5171  | C <sub>60</sub> H <sub>84</sub> O <sub>25</sub>  |
| 32  | 779.4601   | C <sub>41</sub> H <sub>66</sub> O <sub>11</sub> | 116 | 1203.6188  | C <sub>59</sub> H <sub>96</sub> O <sub>25</sub>  |
| 33  | 781.4380   | C <sub>40</sub> H <sub>64</sub> O <sub>12</sub> | 117 | 1205.5972  | C <sub>58</sub> H <sub>94</sub> O <sub>26</sub>  |
| 34  | 785.4095   | C <sub>43</sub> H <sub>62</sub> O <sub>13</sub> | 118 | 1213.5612  | C <sub>58</sub> H <sub>88</sub> O <sub>24</sub>  |
| 35  | 785.4258   | C <sub>47</sub> H <sub>62</sub> O <sub>10</sub> | 119 | 1219.5941  | C <sub>59</sub> H <sub>96</sub> O <sub>26</sub>  |
| 36  | 793.4390   | C <sub>41</sub> H <sub>64</sub> O <sub>12</sub> | 120 | 1219.6117  | C <sub>59</sub> H <sub>96</sub> O <sub>26</sub>  |
| 37  | 795.4553   | C <sub>41</sub> H <sub>66</sub> O <sub>12</sub> | 121 | 1219.6127  | C <sub>58</sub> H <sub>94</sub> O <sub>24</sub>  |
| 38  | 797.4341   | C <sub>40</sub> H <sub>64</sub> O <sub>13</sub> | 122 | 1229.5961  | C <sub>60</sub> H <sub>94</sub> O <sub>26</sub>  |
| 39  | 809.4347   | C <sub>41</sub> H <sub>64</sub> O <sub>13</sub> | 123 | 1229.5962  | C <sub>60</sub> H <sub>94</sub> O <sub>26</sub>  |
| 40  | 811.4500   | C <sub>41</sub> H <sub>66</sub> O <sub>13</sub> | 124 | 1233.5917  | C <sub>59</sub> H <sub>94</sub> O <sub>27</sub>  |

Table S2 Continued

| No. | Mass [m/z] | Formula                                          | No. | Mass [m/z] | Formula                                          |
|-----|------------|--------------------------------------------------|-----|------------|--------------------------------------------------|
| 41  | 811.4864   | C <sub>42</sub> H <sub>70</sub> O <sub>12</sub>  | 125 | 1233.5924  | C <sub>58</sub> H <sub>92</sub> O <sub>25</sub>  |
| 42  | 813.4657   | C <sub>41</sub> H <sub>68</sub> O <sub>13</sub>  | 126 | 1235.6090  | C <sub>58</sub> H <sub>94</sub> O <sub>25</sub>  |
| 43  | 817.4377   | C <sub>44</sub> H <sub>66</sub> O <sub>14</sub>  | 127 | 1249.5203  | C <sub>60</sub> H <sub>84</sub> O <sub>25</sub>  |
| 44  | 825.4290   | C <sub>42</sub> H <sub>66</sub> O <sub>16</sub>  | 128 | 1249.5844  | C <sub>58</sub> H <sub>92</sub> O <sub>26</sub>  |
| 45  | 825.4652   | C <sub>42</sub> H <sub>68</sub> O <sub>13</sub>  | 129 | 1249.5914  | C <sub>58</sub> H <sub>92</sub> O <sub>26</sub>  |
| 46  | 841.4617   | C <sub>43</sub> H <sub>70</sub> O <sub>16</sub>  | 130 | 1249.6243  | C <sub>59</sub> H <sub>96</sub> O <sub>25</sub>  |
| 47  | 847.3814   | C <sub>46</sub> H <sub>58</sub> O <sub>13</sub>  | 131 | 1251.6023  | C <sub>58</sub> H <sub>94</sub> O <sub>26</sub>  |
| 48  | 851.4438   | C <sub>44</sub> H <sub>68</sub> O <sub>16</sub>  | 132 | 1263.6038  | C <sub>59</sub> H <sub>94</sub> O <sub>27</sub>  |
| 49  | 855.4758   | C <sub>43</sub> H <sub>70</sub> O <sub>14</sub>  | 133 | 1265.6187  | C <sub>59</sub> H <sub>96</sub> O <sub>26</sub>  |
| 50  | 875.6057   | C <sub>47</sub> H <sub>88</sub> O <sub>14</sub>  | 134 | 1275.6021  | C <sub>61</sub> H <sub>96</sub> O <sub>28</sub>  |
| 51  | 879.4072   | C <sub>47</sub> H <sub>62</sub> O <sub>13</sub>  | 135 | 1275.6007  | C <sub>60</sub> H <sub>94</sub> O <sub>27</sub>  |
| 52  | 879.4771   | C <sub>46</sub> H <sub>72</sub> O <sub>16</sub>  | 136 | 1279.5925  | C <sub>59</sub> H <sub>94</sub> O <sub>27</sub>  |
| 53  | 895.3824   | C <sub>39</sub> H <sub>62</sub> O <sub>20</sub>  | 137 | 1281.6143  | C <sub>59</sub> H <sub>96</sub> O <sub>27</sub>  |
| 54  | 895.4695   | C <sub>45</sub> H <sub>70</sub> O <sub>15</sub>  | 138 | 1287.7640  | C <sub>63</sub> H <sub>116</sub> O <sub>26</sub> |
| 55  | 895.5067   | C <sub>47</sub> H <sub>76</sub> O <sub>16</sub>  | 139 | 1291.5278  | C <sub>58</sub> H <sub>86</sub> O <sub>29</sub>  |
| 56  | 897.4868   | C <sub>45</sub> H <sub>72</sub> O <sub>15</sub>  | 140 | 1291.5988  | C <sub>60</sub> H <sub>94</sub> O <sub>27</sub>  |
| 57  | 911.4997   | C <sub>46</sub> H <sub>74</sub> O <sub>15</sub>  | 141 | 1291.6328  | C <sub>61</sub> H <sub>98</sub> O <sub>26</sub>  |
| 58  | 911.5030   | C <sub>47</sub> H <sub>76</sub> O <sub>17</sub>  | 142 | 1293.6133  | C <sub>60</sub> H <sub>96</sub> O <sub>27</sub>  |
| 59  | 925.4113   | C <sub>44</sub> H <sub>64</sub> O <sub>18</sub>  | 143 | 1295.6217  | C <sub>60</sub> H <sub>98</sub> O <sub>27</sub>  |
| 60  | 925.4796   | C <sub>46</sub> H <sub>72</sub> O <sub>16</sub>  | 144 | 1297.6021  | C <sub>60</sub> H <sub>98</sub> O <sub>30</sub>  |
| 61  | 927.4977   | C <sub>46</sub> H <sub>74</sub> O <sub>16</sub>  | 145 | 1301.5782  | C <sub>61</sub> H <sub>92</sub> O <sub>27</sub>  |
| 62  | 937.4811   | C <sub>48</sub> H <sub>74</sub> O <sub>18</sub>  | 146 | 1305.6130  | C <sub>61</sub> H <sub>96</sub> O <sub>27</sub>  |
| 63  | 939.4977   | C <sub>48</sub> H <sub>76</sub> O <sub>18</sub>  | 147 | 1307.6284  | C <sub>61</sub> H <sub>98</sub> O <sub>27</sub>  |
| 64  | 941.4739   | C <sub>46</sub> H <sub>72</sub> O <sub>17</sub>  | 148 | 1317.5728  | C <sub>61</sub> H <sub>92</sub> O <sub>28</sub>  |
| 65  | 941.5120   | C <sub>47</sub> H <sub>76</sub> O <sub>16</sub>  | 149 | 1317.6093  | C <sub>62</sub> H <sub>96</sub> O <sub>27</sub>  |
| 66  | 943.7039   | C <sub>53</sub> H <sub>100</sub> O <sub>13</sub> | 150 | 1323.6232  | C <sub>61</sub> H <sub>98</sub> O <sub>28</sub>  |
| 67  | 955.4905   | C <sub>47</sub> H <sub>74</sub> O <sub>17</sub>  | 151 | 1343.5870  | C <sub>63</sub> H <sub>94</sub> O <sub>28</sub>  |
| 68  | 955.4921   | C <sub>48</sub> H <sub>76</sub> O <sub>19</sub>  | 152 | 1343.7899  | C <sub>66</sub> H <sub>120</sub> O <sub>27</sub> |
| 69  | 957.5071   | C <sub>47</sub> H <sub>76</sub> O <sub>17</sub>  | 153 | 1351.6381  | C <sub>60</sub> H <sub>104</sub> O <sub>33</sub> |
| 70  | 971.4866   | C <sub>48</sub> H <sub>76</sub> O <sub>20</sub>  | 154 | 1359.6226  | C <sub>64</sub> H <sub>98</sub> O <sub>28</sub>  |
| 71  | 971.5224   | C <sub>48</sub> H <sub>78</sub> O <sub>17</sub>  | 155 | 1365.6356  | C <sub>63</sub> H <sub>100</sub> O <sub>29</sub> |
| 72  | 971.6624   | C <sub>47</sub> H <sub>74</sub> O <sub>18</sub>  | 156 | 1375.6132  | C <sub>65</sub> H <sub>100</sub> O <sub>31</sub> |
| 73  | 973.5010   | C <sub>47</sub> H <sub>76</sub> O <sub>18</sub>  | 157 | 1381.6653  | C <sub>64</sub> H <sub>104</sub> O <sub>29</sub> |
| 74  | 983.4863   | C <sub>48</sub> H <sub>74</sub> O <sub>18</sub>  | 158 | 1381.6656  | C <sub>65</sub> H <sub>106</sub> O <sub>31</sub> |
| 75  | 987.5175   | C <sub>48</sub> H <sub>78</sub> O <sub>18</sub>  | 159 | 1395.6453  | C <sub>64</sub> H <sub>102</sub> O <sub>30</sub> |
| 76  | 997.5002   | C <sub>49</sub> H <sub>76</sub> O <sub>18</sub>  | 160 | 1411.6366  | C <sub>64</sub> H <sub>102</sub> O <sub>31</sub> |
| 77  | 997.5031   | C <sub>50</sub> H <sub>78</sub> O <sub>20</sub>  | 161 | 1411.6753  | C <sub>65</sub> H <sub>106</sub> O <sub>30</sub> |
| 78  | 999.4807   | C <sub>48</sub> H <sub>74</sub> O <sub>19</sub>  | 162 | 1427.6703  | C <sub>65</sub> H <sub>106</sub> O <sub>31</sub> |
| 79  | 1013.5329  | C <sub>50</sub> H <sub>80</sub> O <sub>18</sub>  | 163 | 1433.7686  | C <sub>64</sub> H <sub>122</sub> O <sub>34</sub> |
| 80  | 1015.5142  | C <sub>49</sub> H <sub>78</sub> O <sub>19</sub>  | 164 | 1435.8531  | C <sub>73</sub> H <sub>128</sub> O <sub>27</sub> |

**Table S2 Continued**

| No. | Mass [m/z] | Formula                                         | No. | Mass [m/z] | Formula                                          |
|-----|------------|-------------------------------------------------|-----|------------|--------------------------------------------------|
| 81  | 1023.4797  | C <sub>50</sub> H <sub>74</sub> O <sub>19</sub> | 165 | 1437.6547  | C <sub>66</sub> H <sub>104</sub> O <sub>31</sub> |
| 82  | 1029.0399  | C <sub>52</sub> H <sub>72</sub> O <sub>24</sub> | 166 | 1459.7366  | C <sub>68</sub> H <sub>116</sub> O <sub>33</sub> |
| 83  | 1029.5288  | C <sub>50</sub> H <sub>80</sub> O <sub>19</sub> | 167 | 1465.8455  | C <sub>70</sub> H <sub>130</sub> O <sub>31</sub> |
| 84  | 1039.5109  | C <sub>51</sub> H <sub>78</sub> O <sub>19</sub> | 168 | 1469.6805  | C <sub>67</sub> H <sub>108</sub> O <sub>32</sub> |

**Table S3** 164 potential targets of 26 BBB-permeated saponins related to AD

| No. | Protein Name                                         | Gene Symbol | No. | Protein Name                                     | Gene Symbol |
|-----|------------------------------------------------------|-------------|-----|--------------------------------------------------|-------------|
| 1   | Signal transducer and activator of transcription 3   | STAT3       | 83  | Adenosine kinase                                 | ADK         |
| 2   | Prothrombin                                          | F2          | 84  | Fibroblast growth factor receptor 2              | FGFR2       |
| 3   | Bcl-2-like protein 1                                 | BCL2L1      | 85  | Glycogen synthase kinase-3 beta                  | GSK3B       |
| 4   | Transcription factor AP-1                            | JUN         | 86  | RAC-beta serine/threonine-protein kinase         | AKT2        |
| 5   | Prostaglandin G/H synthase 2                         | PTGS2       | 87  | NAD                                              | NQO1        |
| 6   | E3 ubiquitin-protein ligase Mdm2                     | MDM2        | 88  | Death-associated protein kinase 1                | DAPK1       |
| 7   | Serine/threonine-protein phosphatase 2A activator    | PTPA        | 89  | Urokinase-type plasminogen activator             | PLAU        |
| 8   | Corticosteroid 11-beta-dehydrogenase isozyme 1       | HSD11B1     | 90  | Coagulation factor VII                           | F7          |
| 9   | Sodium/potassium-transporting ATPase subunit alpha-1 | ATP1A1      | 91  | Poly                                             | PARP1       |
| 10  | Protein kinase C delta type                          | PRKCD       | 92  | Alpha-1-antitrypsin                              | SERPINA1    |
| 11  | Protein kinase C epsilon type                        | PRKCE       | 93  | Tyrosine-protein kinase JAK3                     | JAK3        |
| 12  | Protein kinase C theta type                          | PRKCE       | 94  | Fibroblast growth factor receptor 1              | FGFR1       |
| 13  | Presenilin-2                                         | PSEN2       | 95  | Catalase                                         | CAT         |
| 14  | Glycine receptor subunit alpha-1                     | GLRA1       | 96  | Aldehyde dehydrogenase, mitochondrial            | ALDH2       |
| 15  | Glycine receptor subunit alpha-2                     | GLRA2       | 97  | Retinoic acid receptor beta                      | RARB        |
| 16  | Gamma-secretase subunit PEN-2                        | PSENEN      | 98  | Receptor tyrosine-protein kinase erbB-4          | ERBB4       |
| 17  | Nicastrin                                            | NCSTN       | 99  | Glucocorticoid receptor                          | NR3C1       |
| 18  | Gamma-secretase subunit APH-1A                       | APH1A       | 100 | Peroxisome proliferator-activated receptor delta | PPARD       |
| 19  | Presenilin-1                                         | PSEN1       | 101 | Neutrophil elastase                              | ELANE       |
| 20  | Gamma-secretase subunit APH-1B                       | APH1B       | 102 | Histamine N-methyltransferase                    | HNMT        |
| 21  | Mitogen-activated protein kinase 1                   | MAPK1       | 103 | Cytochrome P450 2C9                              | CYP2C9      |
| 22  | Bone morphogenetic protein 2                         | BMP2        | 104 | Retinoic acid receptor alpha                     | RARA        |
| 23  | Glutathione S-transferase P                          | GSTP1       | 105 | Insulin-like growth factor 1 receptor            | IGF1R       |

**Table S3 Continued**

| No. | Protein Name                                     | Gene Symbol | No. | Protein Name                                           | Gene Symbol |
|-----|--------------------------------------------------|-------------|-----|--------------------------------------------------------|-------------|
| 24  | Mitogen-activated protein kinase 10              | MAPK10      | 106 | Phenylethanolamine N-methyltransferase                 | PNMT        |
| 25  | Neutrophil gelatinase-associated lipocalin       | LCN2        | 107 | Interleukin-2                                          | IL2         |
| 26  | Peroxisome proliferator-activated receptor gamma | PPARG       | 108 | Oxysterols receptor LXR-alpha                          | NR1H3       |
| 27  | Albumin                                          | ALB         | 109 | Matrix metalloproteinase-9                             | MMP9        |
| 28  | Caspase-7                                        | CASP7       | 110 | C-C motif chemokine 5                                  | CCL5        |
| 29  | Kinesin-like protein KIF11                       | KIF11       | 111 | Tyrosine-protein kinase ZAP-70                         | ZAP70       |
| 30  | Apolipoprotein A-II                              | APOA2       | 112 | Tyrosine-protein kinase JAK2                           | JAK2        |
| 31  | Estrogen receptor beta                           | ESR2        | 113 | Tyrosine-protein kinase ABL1                           | ABL1        |
| 32  | Aromatase                                        | CYP19A1     | 114 | Prosaposin                                             | PSAP        |
| 33  | Transthyretin                                    | TTR         | 115 | Protein S100-A9                                        | S100A9      |
| 34  | Stromelysin-1                                    | MMP3        | 116 | 72 kDa type IV collagenase                             | MMP2        |
| 35  | Aldo-keto reductase family 1 member B1           | AKR1B1      | 117 | Mitogen-activated protein kinase 12                    | MAPK12      |
| 36  | Amine oxidase                                    | MAOB        | 118 | Hepatocyte growth factor                               | HGF         |
| 37  | Lysosomal acid glucosylceramidase                | GBA         | 119 | Nepriylsin                                             | MME         |
| 38  | Cathepsin D                                      | CTSD        | 120 | Cystathionine beta-synthase                            | CBS         |
| 39  | Mitogen-activated protein kinase 8               | MAPK8       | 121 | Caspase-1                                              | CASP1       |
| 40  | Cholinesterase                                   | BCHE        | 122 | Hexokinase-4                                           | GCK         |
| 41  | Androgen receptor                                | AR          | 123 | Phosphatidylinositol 3-kinase regulatory subunit alpha | PIK3R1      |
| 42  | Caspase-3                                        | CASP3       | 124 | Vitamin D3 receptor                                    | VDR         |
| 43  | Coagulation factor X                             | F10         | 125 | E3 ubiquitin-protein ligase XIAP                       | XIAP        |
| 44  | Proto-oncogene tyrosine-protein kinase Src       | SRC         | 126 | Tryptophan 5-hydroxylase 1                             | TPH1        |
| 45  | Epidermal growth factor receptor                 | EGFR        | 127 | GTPase HRas                                            | HRAS        |
| 46  | Angiogenin                                       | ANG         | 128 | Angiopoietin-1 receptor                                | TEK         |

**Table S3 Continued**

| No. | Protein Name                                                   | Gene Symbol | No. | Protein Name                                                  | Gene Symbol |
|-----|----------------------------------------------------------------|-------------|-----|---------------------------------------------------------------|-------------|
| 47  | Nitric oxide synthase, endothelial                             | NOS3        | 129 | Glycogen phosphorylase, liver form                            | PYGL        |
| 48  | TGF-beta receptor type-1                                       | TGFBR1      | 130 | Mast/stem cell growth factor receptor Kit                     | KIT         |
| 49  | Kinesin-1 heavy chain                                          | KIF5B       | 131 | Coagulation factor XI                                         | F11         |
| 50  | Disintegrin and metalloproteinase domain-containing protein 17 | ADAM17      | 132 | Insulin receptor                                              | INSR        |
| 51  | cAMP-dependent protein kinase catalytic subunit alpha          | PRKACA      | 133 | Heme oxygenase 1                                              | HMOX1       |
| 52  | Beta-secretase 1                                               | BACE1       | 134 | Angiotensin-converting enzyme                                 | ACE         |
| 53  | Vascular endothelial growth factor receptor 2                  | KDR         | 135 | Transforming growth factor beta-2 proprotein                  | TGFB2       |
| 54  | Chitotriosidase-1                                              | CHIT1       | 136 | Apoptotic protease-activating factor 1                        | APAF1       |
| 55  | Collagenase 3                                                  | MMP13       | 137 | Platelet glycoprotein Ib alpha chain                          | GP1BA       |
| 56  | Tyrosine-protein phosphatase non-receptor type 11              | PTPN11      | 138 | Glutathione S-transferase Mu 1                                | GSTM1       |
| 57  | Glutathione reductase, mitochondrial                           | GSR         | 139 | Interstitial collagenase                                      | MMP1        |
| 58  | Estrogen receptor                                              | ESR1        | 140 | Cell division control protein 42 homolog                      | CDC42       |
| 59  | Cathepsin B                                                    | CTSB        | 141 | Signal transducer and activator of transcription 1-alpha/beta | STAT1       |
| 60  | Macrophage migration inhibitory factor                         | MIF         | 142 | Lithostathine-1-alpha                                         | REG1A       |
| 61  | Mineralocorticoid receptor                                     | NR3C2       | 143 | Glucose-6-phosphate 1-dehydrogenase                           | G6PD        |
| 62  | Heat shock cognate 71 kDa protein                              | HSPA8       | 144 | Beta-hexosaminidase subunit beta                              | HEXB        |
| 63  | Hepatocyte growth factor receptor                              | MET         | 145 | Fructose-bisphosphate aldolase A                              | ALDOA       |
| 64  | cAMP-specific 3',5'-cyclic phosphodiesterase 4D                | PDE4D       | 146 | E-selectin                                                    | SELE        |
| 65  | Macrophage metalloelastase                                     | MMP12       | 147 | Complement factor B                                           | CFB         |
| 66  | Mitogen-activated protein kinase 14                            | MAPK14      | 148 | TGF-beta receptor type-2                                      | TGFBR2      |
| 67  | Alcohol dehydrogenase 1C                                       | ADH1C       | 149 | Casein kinase II subunit alpha                                | CSNK2A1     |
| 68  | Renin                                                          | REN         | 150 | Hexokinase-1                                                  | HK1         |
| 69  | Phospholipase A2, membrane associated                          | PLA2G2A     | 151 | Calmodulin-1                                                  | CALM1       |

**Table S3 Continued**

| No. | Protein Name                                               | Gene Symbol | No. | Protein Name                                                     | Gene Symbol |
|-----|------------------------------------------------------------|-------------|-----|------------------------------------------------------------------|-------------|
| 70  | Phenylalanine-4-hydroxylase                                | PAH         | 152 | Nitric oxide synthase, inducible                                 | NOS2        |
| 71  | 3-hydroxy-3-methylglutaryl-coenzyme A reductase            | HMGCR       | 153 | P-selectin                                                       | SELP        |
| 72  | Insulin-like growth factor I                               | IGF1        | 154 | Arylsulfatase A                                                  | ARSA        |
| 73  | Ornithine transcarbamylase, mitochondrial                  | OTC         | 155 | Cyclin-dependent kinase 5 activator 1                            | CDK5R1      |
| 74  | Retinol-binding protein 4                                  | RBP4        | 156 | RAC-alpha serine/threonine-protein kinase                        | AKT1        |
| 75  | Bile acid receptor                                         | NR1H4       | 157 | Hypoxanthine-guanine phosphoribosyltransferase                   | HPRT1       |
| 76  | Tyrosine--tRNA ligase, cytoplasmic                         | YARS1       | 158 | Tryptophan--tRNA ligase, cytoplasmic                             | WARS1       |
| 77  | Superoxide dismutase                                       | SOD2        | 159 | SPARC                                                            | SPARC       |
| 78  | Cathepsin K                                                | CTSK        | 160 | Glutamate carboxypeptidase 2                                     | FOLH1       |
| 79  | Tyrosine-protein kinase SYK                                | SYK         | 161 | A disintegrin and metalloproteinase with thrombospondin motifs 4 | ADAMTS4     |
| 80  | Peroxisome proliferator-activated receptor alpha           | PPARA       | 162 | Glutathione S-transferase omega-1                                | GSTO1       |
| 81  | Heat shock protein HSP 90-alpha                            | HSP90AA1    | 163 | Fibrinogen gamma chain                                           | FGG         |
| 82  | Dual specificity mitogen-activated protein kinase kinase 1 | MAP2K1      | 164 | Tyrosine-protein kinase BTK                                      | BTK         |



**Table S4** Molecular docking score of pivotal compounds and targets

| Compound   | Target       | PDBID       | Score          |
|------------|--------------|-------------|----------------|
| <b>B1</b>  | MAPK1        | 3erk        | 9.2615         |
|            | MAP2K1       | 3w8q        | 6.1645         |
|            | <b>HRAS</b>  | <b>6bof</b> | <b>10.1125</b> |
|            | MAPK8        | 4hyu        | 7.3986         |
|            | MAPK10       | 4y46        | 6.4939         |
|            | MAPK14       | 5xyy        | 5.8726         |
| <b>B11</b> | MAPK1        | 3erk        | 5.9672         |
|            | MAP2K1       | 5kkkr       | 6.4056         |
|            | <b>HRAS</b>  | <b>6umk</b> | <b>9.8568</b>  |
|            | MAPK8        | 4izy        | 7.9283         |
|            | MAPK10       | 4kkh        | 7.2712         |
|            | MAPK14       | 5xyy        | 5.7924         |
| <b>B12</b> | <b>MAPK1</b> | <b>6opk</b> | <b>7.862</b>   |
|            | MAP2K1       | 6ate        | 4.4781         |
|            | HRAS         | 6umk        | 7.429          |
|            | MAPK8        | 4izy        | 7.2632         |
|            | MAPK10       | 4kkh        | 5.5554         |
|            | MAPK14       | 2qd9        | 4.7803         |
| <b>B22</b> | MAPK1        | 6opi        | 10.5647        |
|            | MAP2K1       | 5kkkr       | 6.2576         |
|            | HRAS         | 1wms        | 9.8913         |
|            | <b>MAPK8</b> | <b>4hyu</b> | <b>10.8325</b> |
|            | MAPK10       | 4w4w        | 9.7695         |
|            | MAPK14       | 3oef        | 8.5372         |
| <b>B23</b> | MAPK1        | 6oph        | 6.8208         |
|            | MAP2K1       | 5kkkr       | 4.3412         |
|            | HRAS         | 1wms        | 7.1727         |
|            | <b>MAPK8</b> | <b>4izy</b> | <b>8.5017</b>  |
|            | MAPK10       | 4kkh        | 7.4723         |
|            | MAPK14       | 5xyy        | 3.9949         |
| <b>B24</b> | MAPK1        | 6opi        | 6.0721         |
|            | MAP2K1       | 6ate        | 4.2487         |
|            | HRAS         | 1wms        | 6.8063         |
|            | <b>MAPK8</b> | <b>4izy</b> | <b>10.7487</b> |
|            | MAPK10       | 4kkh        | 5.2713         |
|            | MAPK14       | 6m95        | 1.5286         |

The bold color means the highest score in experiments.
